# Supplementary material for: Synthesis and characteristion of LixBC—hole doping does not induce superconductivity
Source: Royal Society of Chemistry journal article supplement (doi:10.1039/b302058d), 2003-01-01
Supplement: b302058d.doc [file b302058d.doc]

Electronic Supplementary Information

Synthesis and characteristion of LixBC – hole doping does not induce superconductivity

A.M. Fogg, J.B. Claridge, G.R. Darling and M.J. Rosseinsky*

Department of Chemistry, University of Liverpool, Liverpool L69 7ZD, UK

LiBC was synthesised according to the method described by Wörle *et al.*In a typical experiment, 0.180g B, 0.195g C and 0.3225g Li were sealed in a tantalum ampoule under an atmosphere of argon in an arc furnace. The excess lithium is required as a solvent and to compensate for losses during the reaction, which occur because the Ta tube is partially transparent to Li under the synthesis conditions – this allows extended heating at this temperature to form LixBC. The ampoule was heated, under a flow of argon, to 773K at a rate of 3K/min. This temperature was maintained for one hour before being raised to 1773K at a rate of 3K/min. This temperature was maintained for between one and 24 hours depending on the desired stoichiometry of the product. The sample was then cooled to room temperature at a rate of 10K/min. In each case the polycrystalline sample was handled under an inert atmosphere. Initial characterisation was by powder X-ray diffraction (Stoe Stadi-P, Cu K1, linear position sensitive detector). d.c. magnetisation measurements were performed in 20G and 40G fields in a Quantum Design MPMS XL-7 SQUID magnetometer between 2 and 300K.

Samples for neutron diffraction studies were prepared in a similar manner from 11B supplied by Eagle-Picher Technologies. As a consequence of the larger particle size of the initial boron it was necessary to maintain the sample at 773K for two hours in order to ensure complete reaction, and these different reaction kinetics may lead to subtle differences between samples studied with X-ray and neutron techniques. Neutron powder diffraction data were collected on the GEM instrument at the ISIS spallation neutron source, Rutherford Appleton Laboratory at 300K and 5K. Samples were loaded into vanadium sample cans and sealed with indium. Data analysis of these and the laboratory X-ray data were performed with the GSAS suite of programmes. Quantitative analysis of the X-ray data used neutral atom Li, B and C form factors from International Tables, Vol. IV (1971). The displacement parameters for the B and C atoms in both phases were constrained to adopt the same value after preliminary refinement had indicated their similarity. Samples for transmission electron microscopy (TEM) analysis were prepared suspending a fine powder in acetonitrile. A drop of the suspension was then deposited onto a holey carbon grid and the solvent was allowed to evaporate Selected area diffraction diffraction (SAED) patterns were obtained by use of a double-tilting goniometer stage (±30º) to tilt the specimen in a JEOL 2000 FX transmission electron microscope.

Whilst all the samples were handled as if air sensitive, the powder X-ray diffraction pattern of a sample of overall composition Li0.87BC was unchanged on exposure of the sample to air for two weeks.

DFT calculations have been performed with a plane-wave basis set, with an energy cut-off of 340 eV, using ultra-soft pseudopotentials for the atoms. For the LixBC structures, the geometry was optimized in P1 symmetry using a Brillouin zone sampling of 24-27 special k-points. Exchange and correlation has been included using the PBE version of GGA.
